# Supplementary material for: Improved Methodical Approach for Quantitative BRET Analysis of G Protein Coupled Receptor Dimerization
Source: PubMed Central journal article supplement (PMC4201472; doi:10.1371/journal.pone.0109503), 2014-10-17

Figure S2:

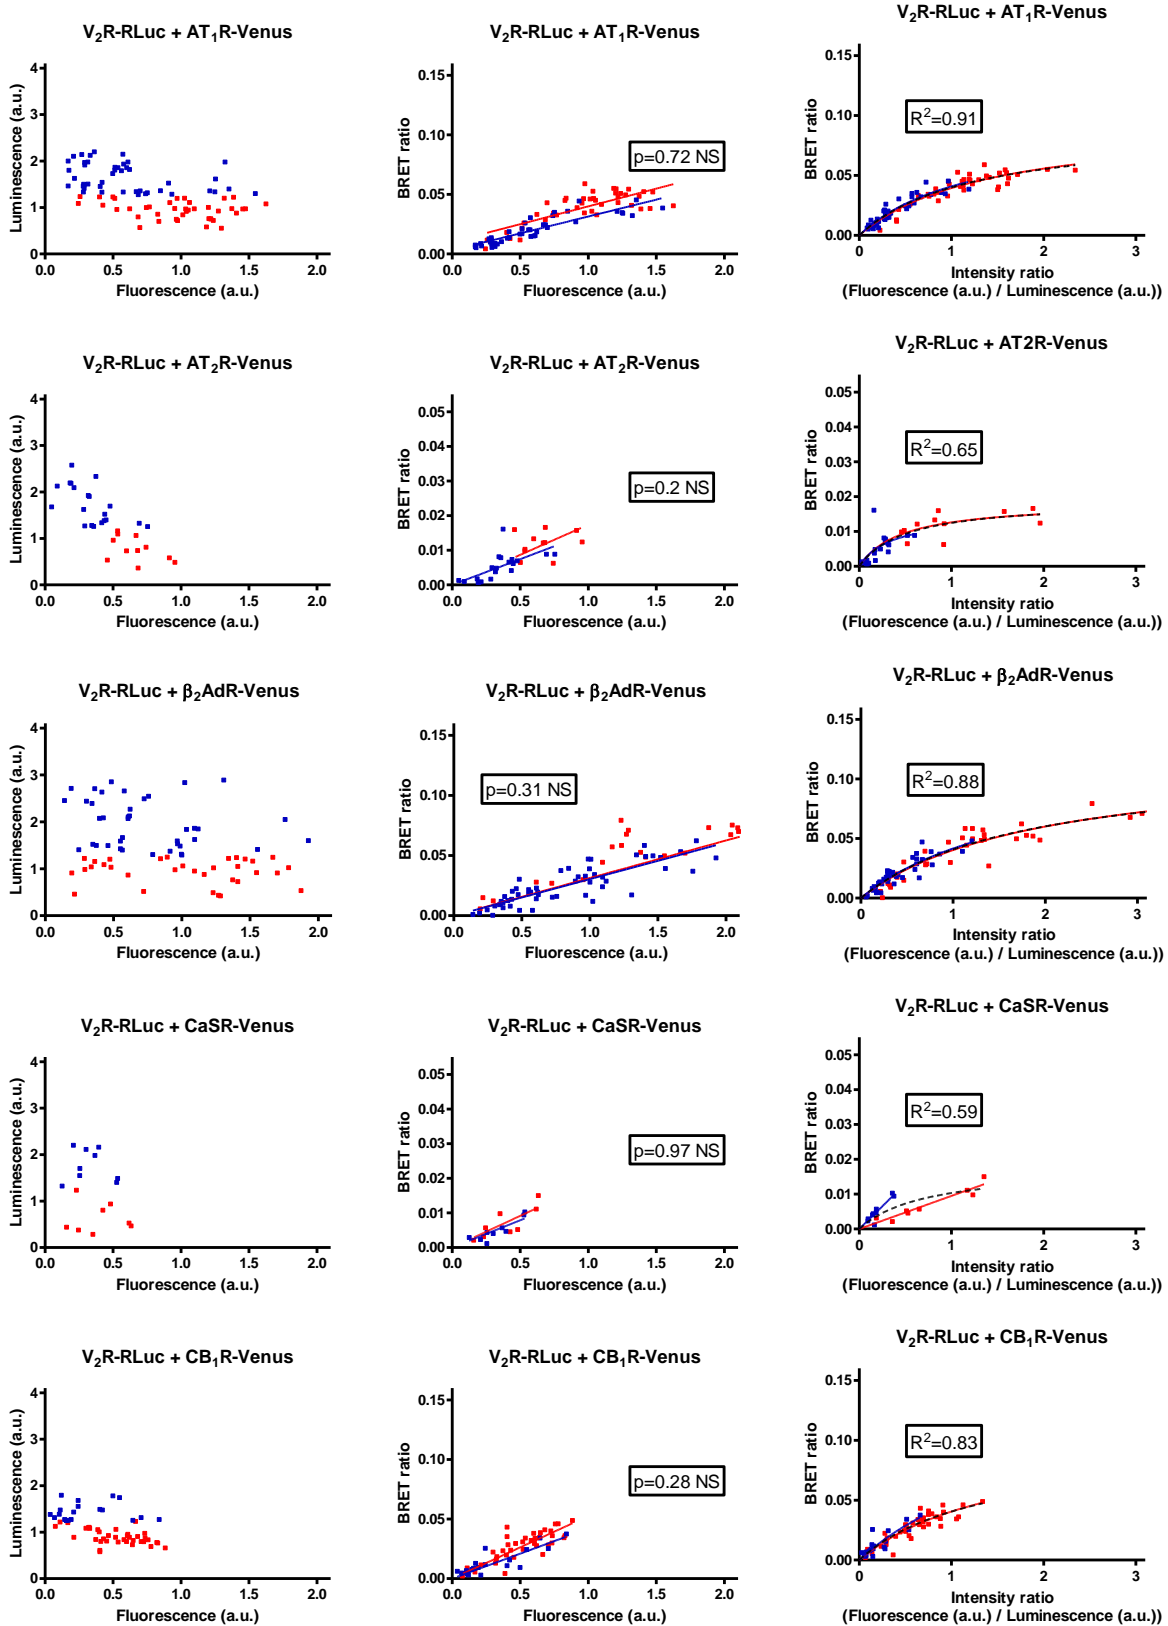

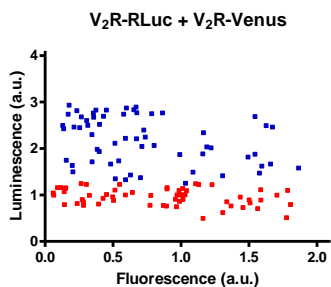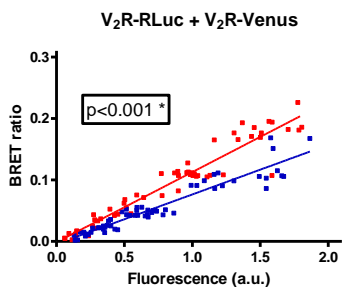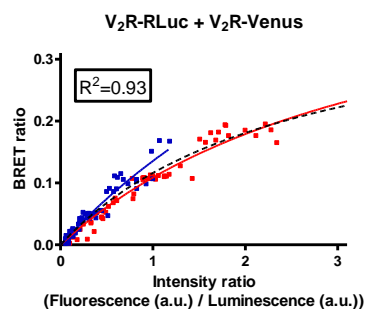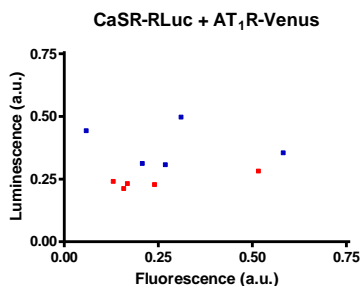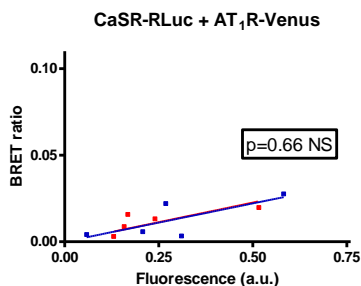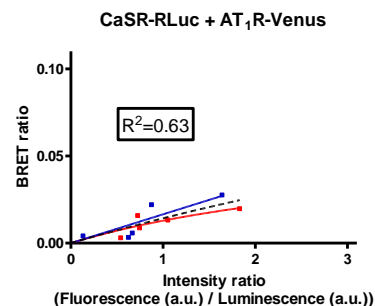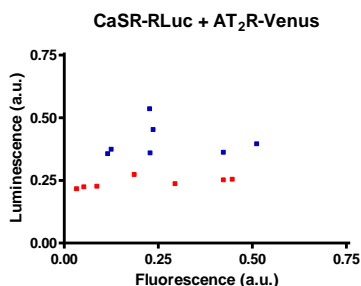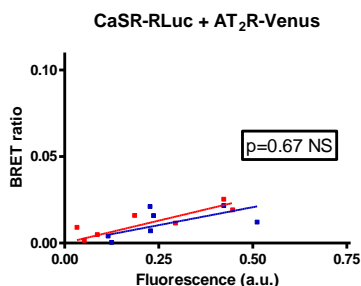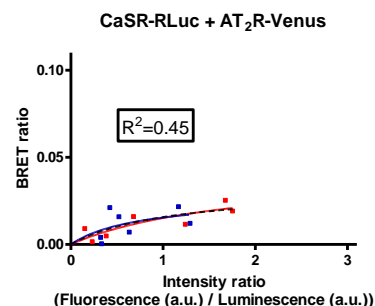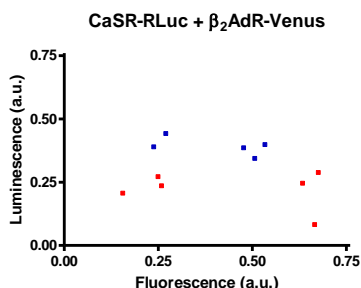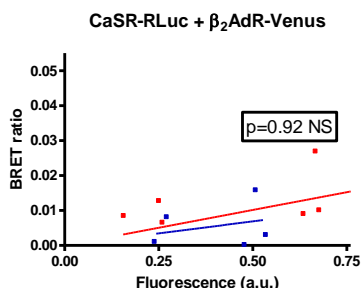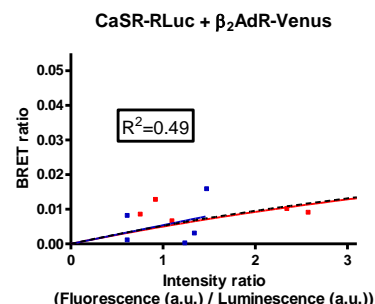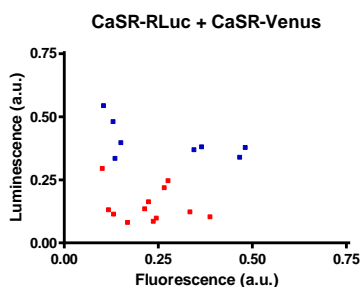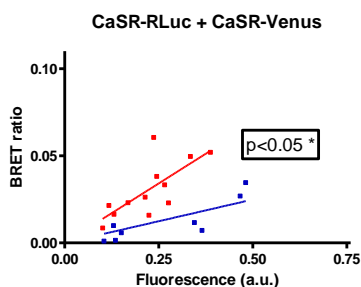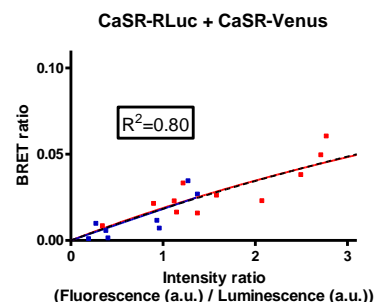

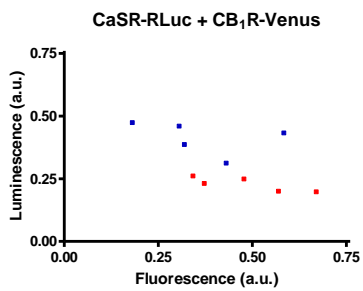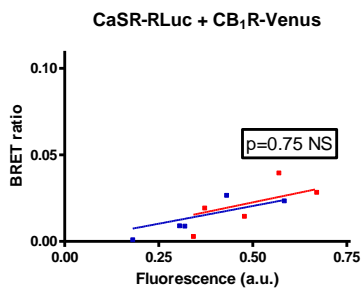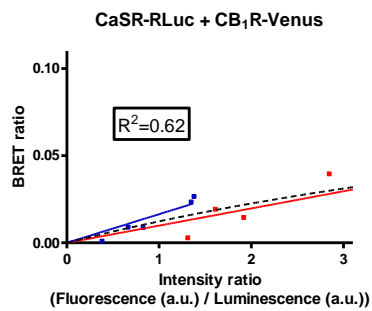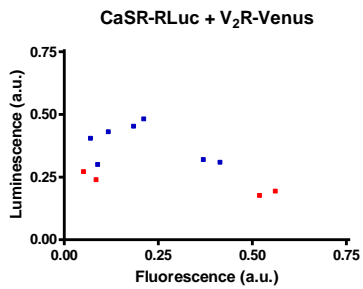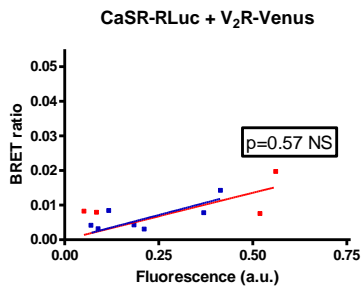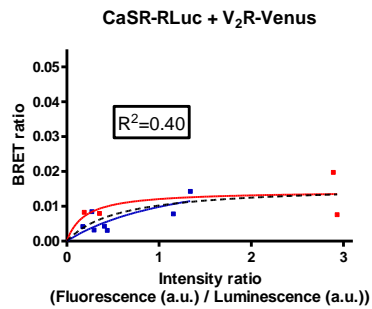

Supplement: pone.0109503.s002.pdf [file pone.0109503.s002.pdf]
